# Supplementary material for: Does Curing Moisture Content Affect Black Garlic Physiochemical Quality?
Source: MDPI journal article supplement (doi:10.3390/horticulturae7120535), 2021-12-02
Supplement: s1 [file s1]

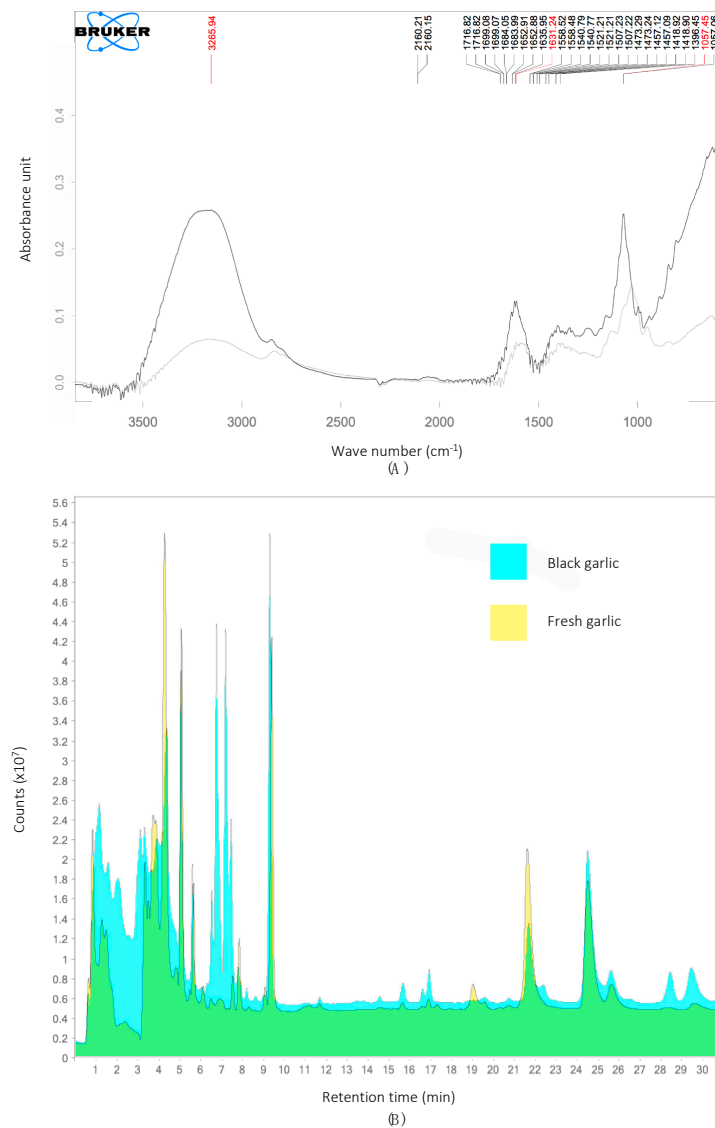

**Figure S1: (A)** The FTIR spectrum between fresh garlic and black garlic. **(B)** The QTOF chromatogram of fresh garlic and black garlic sample.



|                              |                                                         |                                                                 |        |        |               |               |               |               |               |               |               |
|------------------------------|---------------------------------------------------------|-----------------------------------------------------------------|--------|--------|---------------|---------------|---------------|---------------|---------------|---------------|---------------|
| 14                           | gamma-Glutamyl-S-(1-propenyl)cysteine sulfoxide         | C <sub>11</sub> H <sub>18</sub> N <sub>2</sub> O <sub>6</sub> S | 1.17   | 307.10 | 4,031,678.00  | 0.00          | 0.00          | 0.00          | 0.00          | 0             | 0             |
| 15                           | gamma-L-Glutamyl-S-(2-carboxy-1-propyl)cysteinylglycine | C <sub>14</sub> H <sub>23</sub> N <sub>3</sub> O <sub>8</sub> S | 3.56   | 394.13 | 11,984,540.00 | 1,062,240.00  | 1,865,388.00  | 2,736,645.00  | 1,283,113.00  | 470,411.00    | 400,128.00    |
| 16                           | N-gamma-Glutamyl-S-allylcysteine                        | C <sub>11</sub> H <sub>18</sub> N <sub>2</sub> O <sub>5</sub> S | 3.82   | 291.10 | 69,655,308.00 | 24,536,766.00 | 27,896,175.00 | 23,439,749.00 | 5,449,319.00  | 2,769,807.00  | 2,471,941.00  |
| 17                           | Allicin                                                 | C <sub>6</sub> H <sub>10</sub> OS <sub>2</sub>                  | 4.39   | 163.03 | 3,115,817.00  | 0.00          | 0.00          | 0.00          | 0.00          | 0.00          | 0.00          |
| 18                           | S-Allyl cysteine                                        | C <sub>6</sub> H <sub>11</sub> NO <sub>2</sub> S                | 1.95   | 162.06 | 0.00          | 15,271,973.00 | 15,446,809.00 | 20,950,972.00 | 19,769,474.00 | 21,634,812.00 | 21,467,241.00 |
| <b>Antioxidant compounds</b> |                                                         |                                                                 |        |        |               |               |               |               |               |               |               |
| 19                           | Zinolol                                                 | C <sub>14</sub> H <sub>21</sub> NO <sub>8</sub>                 | 1.37   | 332.14 | 13,794,656.00 | 0.00          | 0.00          | 0.00          | 0.00          | 0.00          | 0.00          |
| 20                           | Niazirin                                                | C <sub>15</sub> H <sub>21</sub> NO <sub>6</sub> S               | 5.09   | 343.40 | 5,868,900.00  | 0.00          | 0.00          | 0.00          | 0.00          | 0.00          | 0.00          |
| 21                           | Lancerin                                                | C <sub>19</sub> H <sub>18</sub> O <sub>10</sub>                 | 8.30   | 406.30 | 950,926.00    | 0.00          | 0.00          | 0.00          | 0.00          | 0.00          | 0.00          |
| 22                           | Blancoxanthone                                          | C <sub>23</sub> H <sub>22</sub> O <sub>5</sub>                  | 4.00   | 379.15 | 1,945,972.00  | 0.00          | 0.00          | 0.00          | 0.00          | 0.00          | 0.00          |
| 23                           | Cyclodopa glucoside                                     | C <sub>15</sub> H <sub>19</sub> NO <sub>9</sub>                 | 3.99   | 357.31 | 2,426,257.00  | 0.00          | 0.00          | 0.00          | 0.00          | 0.00          | 0.00          |
| 24                           | Oleuropein                                              | C <sub>25</sub> H <sub>32</sub> O <sub>13</sub>                 | 4.3.00 | 540.18 | 1,408,262.00  | 0.00          | 0.00          | 0.00          | 0.00          | 0.00          | 0.00          |
| 25                           | Sakuranetin                                             | C <sub>16</sub> H <sub>14</sub> O <sub>5</sub>                  | 4.83   | 309.07 | 960,001.00    | 0.00          | 0.00          | 0.00          | 0.00          | 0.00          | 0.00          |
| 26                           | Eusiderin                                               | C <sub>22</sub> H <sub>26</sub> O <sub>6</sub>                  | 4.89   | 387.18 | 1,529,458.00  | 556,981.00    | 753,094.00    | 1,023,517.00  | 1,614,853.00  | 1,649,028.00  | 969,628.00    |
| 27                           | Phellamurin                                             | C <sub>26</sub> H <sub>30</sub> O <sub>11</sub>                 | 4.35   | 541.17 | 0.00          | 2,908,150.00  | 3,417,597.00  | 1,571,634.00  | 1,622,727.00  | 2,471,277.00  | 2,310,401.00  |
| 28                           | Phenyl salicylate                                       | C <sub>13</sub> H <sub>10</sub> O <sub>3</sub>                  | 4.40   | 232.10 | 0.00          | 7,333,264.00  | 9,036,029.00  | 7,030,611.00  | 12,345,561.00 | 18,577,653.00 | 17,841,342.00 |
| 29                           | Allixin                                                 | C <sub>12</sub> H <sub>18</sub> O <sub>4</sub>                  | 5.11   | 239.34 | 0.00          | 28,536,221.00 | 33,271,003.00 | 24,711,530.00 | 37,398,140.00 | 34,713,471.00 | 37,804,448.00 |
| 30                           | Myristicanol A                                          | C <sub>23</sub> H <sub>30</sub> O <sub>8</sub>                  | 3.87   | 434.19 | 0.00          | 1,133,203.00  | 735,751.00    | 1,028,723.00  | 2,277,254.00  | 2,139,501.00  | 2,035,688.00  |

# Other compounds

|    |                                                         |                                                               |      |        |      |               |               |               |               |               |               |
|----|---------------------------------------------------------|---------------------------------------------------------------|------|--------|------|---------------|---------------|---------------|---------------|---------------|---------------|
| 31 | Levofuraltadone                                         | C <sub>13</sub> H <sub>16</sub> N <sub>4</sub> O <sub>6</sub> | 6.45 | 324.29 | 0.00 | 2,097,343.00  | 2,053,851.00  | 1,911,046.00  | 1,481,402.00  | 4,575,546.00  | 2,454,748.00  |
| 32 | Pyroglutamic acid                                       | C <sub>5</sub> H <sub>7</sub> NO <sub>3</sub>                 | 1.23 | 130.05 | 0.00 | 10,279,038.00 | 12,632,978.00 | 16,456,389.00 | 18,628,514.00 | 18,832,791.00 | 19,447,628.00 |
| 33 | Aminonucleoside                                         | C <sub>12</sub> H <sub>18</sub> N <sub>6</sub> O <sub>3</sub> | 5.08 | 294.31 | 0.00 | 2,265,267.00  | 19,404,596.00 | 3,213,917.00  | 2,609,179.00  | 10,642,075.00 | 11,864,887.00 |
| 34 | 2,2-Dimethyl-8-prenylchromene 6-carboxylic acid         | C <sub>17</sub> H <sub>20</sub> O <sub>3</sub>                | 3.93 | 272.14 | 0.00 | 13,503,039.00 | 16,791,072.00 | 14,565,021.00 | 13,694,142.00 | 13,740,268.00 | 13,372,662.00 |
| 35 | 2-Phosphono-1,7-heptanedicarboxylic acid                | C <sub>9</sub> H <sub>17</sub> O <sub>7</sub> P               | 4.43 | 286.11 | 0.00 | 855,234.00    | 2,532,202.00  | 2,238,545.00  | 4,238,853.00  | 7,694,301.00  | 8,367,699.00  |
| 36 | jasmonic acid                                           | C <sub>12</sub> H <sub>18</sub> O <sub>3</sub>                | 5.12 | 323.28 | 0.00 | 744,461.00    | 1,069,483.00  | 735,486.00    | 4,306,117.00  | 962,031.00    | 672,279.00    |
| 37 | 3-Methyl-5-pentyl-2-furannonanoic acid                  | C <sub>19</sub> H <sub>32</sub> O <sub>3</sub>                | 6.47 | 308.24 | 0.00 | 0.00          | 0.00          | 0.00          | 978,657.00    | 2,734,071.00  | 3,557,855.00  |
| 38 | 2'-Deoxymugineic acid                                   | C <sub>12</sub> H <sub>20</sub> N <sub>2</sub> O <sub>7</sub> | 1.02 | 304.13 | 0.00 | 0.00          | 0.00          | 0.00          | 0.00          | 1,816,225.00  | 2,822,766.00  |
| 39 | alpha-(p-Methoxyphenyl)-6-methyl-2-pyridineacrylic acid | C <sub>16</sub> H <sub>15</sub> NO                            | 4.55 | 270.11 | 0.00 | 0.00          | 0.00          | 0.00          | 0.00          | 601,744.00    | 981,476.00    |

<sup>a</sup> m/z value (mass-to-charge ratio). BG1; BG2; BG3; BG4; BG5 and BG6 were processed from WG with different iMC (BG1, BG2, BG3, BG4, BG5 and BG6 with 72.59%, 69.12%, 58.49%, 51.05% 50.87% and 49.77%, respectively).
